# Supplementary material for: Barley SIX-ROWED SPIKE3 encodes a putative Jumonji C-type H3K9me2/me3 demethylase that represses lateral spikelet fertility
Source: PubMed Central journal article supplement (PMC5643332; doi:10.1038/s41467-017-00940-7), 2017-10-16
Supplement: 41467_2017_940_MOESM3_ESM.pdf [file 41467_2017_940_MOESM3_ESM.pdf]

**File name:** Supplementary Information

**Description:** Supplementary Figures, Supplementary Tables, Supplementary Note and Supplementary References

**File name:** Supplementary Data 1

**Description:** Differential Gene Expression and GO Enrichment

**File name:** Supplementary Data 2

**Description:** KASP allele specific PCR target polymorphisms and sequences

**File name:** Supplementary Data 3

**Description:** Protein sequences used for Phylogenetic analysis

**File name:** Supplementary Data 4

**Description:** 22 cultivars fully sequenced for VRS3

**File name:** Supplementary Data 5

**Description:** Geolocations and Vrs3 haplotypes of Wild and Landrace Barley accessions

**File name:** Supplementary Data 6

**Description:** *Vrs3* haplotype diversity across the landrace and wild germplasm surveyed

**File name:** Peer Review File
